# 1 Sniff-invariant intensity perception using olfactory bulb coding 2 of inhalation dynamics

3 Rebecca Jordan<sup>1,2</sup>, Mihaly Kollo<sup>1,2</sup> and \*Andreas T Schaefer<sup>1,2</sup>

4 1. Neurophysiology of Behaviour Laboratory, Francis Crick Institute, London, UK

5 2. Department of Neuroscience, Physiology & Pharmacology, University College London, UK

6 Correspondence and requests for materials, including custom software, should be addressed to A.T.S  
7 via email to [andreas.schaefer@crick.ac.uk](mailto:andreas.schaefer@crick.ac.uk).

## 8 9 Summary

10 **For stable perception of odor intensity, there must exist a neural correlate that is invariant across**  
11 **other parameters, such as the highly variable sniff cycle. Previous hypotheses suggest that variance**  
12 **in inhalation dynamics alters odor concentration profiles in the naris despite a constant**  
13 **environmental concentration. Using whole cell recordings in the olfactory bulb of awake mice, we**  
14 **directly demonstrate that rapid sniffing mimics the effect of odor concentration increase at the level**  
15 **of both mitral and tufted cell (MTC) firing rate responses and temporal responses. In contrast, we**  
16 **find that mice are capable of discriminating concentrations within short timescales despite highly**  
17 **variable sniffing behavior. We reason that the only way the olfactory system can differentiate**  
18 **between a change in sniffing and a change in concentration is to receive information about the**  
19 **inhalation parameters in parallel with information about the odor. While conceivably this could be**  
20 **achieved via corollary discharge from respiration control centres, we find that the sniff-driven**  
21 **activity of MTCs without odor input is informative of the kind of inhalation that just occurred,**  
22 **allowing rapid detection of a change in inhalation. Thus, a possible reason for sniff modulation of**  
23 **the early olfactory system may be to inform downstream centres of nasal flow dynamics, so that an**  
24 **inference can be made about environmental concentration independent of sniff variance.**

25 For consistency of perception, sensory systems must be able to stably encode the same perceptual  
26 features across a wide range of situations. An example of this is the encoding of object size  
27 independent of object distance in the visual system (Helmholtz, 1867) – we do not perceive a giant  
28 apple when viewed at close range, and similarly we do not misperceive buildings as tiny objects when  
29 viewed from great distance. In the olfactory system, studies have looked at how odor identity may be  
30 encoded independent of odor concentration (Cleland et al., 2012; Uchida and Mainen, 2008;  
31 Wachowiak et al., 2002; Wilson et al., 2017) and sniff cycle variance (Cury and Uchida, 2010). An  
32 olfactory problem that has received less attention, however, is stable encoding of odor intensity – the  
33 perceptual correlate of odor concentration (Wojcik and Sirotin, 2014). Increasing concentration is  
34 known to affect neural activity in many ways (Mainland et al., 2014). At the level of glomerular input  
35 from olfactory sensory neurons (OSNs), increasing concentration enhances the activity of already  
36 responsive glomeruli and incorporates new glomeruli into the activity profile, overall resulting in a  
37 broadening of the spatial ‘map’ of activity (Rubin and Katz, 1999; Spors and Grinvald, 2002). Changes  
38 in spike rate are also seen at the level of the olfactory bulb output cells, mitral and tufted cells (MTCs),  
39 though this can be a more complex mixture of inhibitory and excitatory effects (Bathellier et al., 2008;  
40 Cury and Uchida, 2010; Fukunaga et al., 2012; Meredith, 1986), and is thought to be constrained via  
41 inhibitory circuits (Kato et al., 2013; Miyamichi et al., 2013; Roland et al., 2016). The perhaps more  
42 ubiquitous correlates of concentration increase, however, are temporal response changes, notably  
43 with early excitation undergoing a latency reduction in OSNs (Ghatpande and Reisert, 2011; Rospars  
44 et al., 2000), MTCs (Cang and Isaacson, 2003; Fukunaga et al., 2012; Sirotin et al., 2015), as well as in  
45 the piriform cortex (Bolding and Franks, 2017). This is thought to arise since OSNs will depolarise to  
46 threshold more quickly when the concentration profile in the naris is steeper.

47 In awake mice, sniffing behaviour is in continual flux (Kepecs et al., 2007; Welker, 1964; Wesson et al.,  
48 2008a, 2009; Youngentob et al., 1987). This might present a problem for concentration coding: firstly,  
49 changing flow will affect the number of odor molecules entering the nasal passage, altering the  
50 concentration profile in the naris despite a stable environmental concentration (Mainland and Sobel,

51 2006; Shusterman et al., 2017; Teghtsoonian et al., 1978). Secondly, altering the velocity of air in the  
52 naris will alter the time at which odorised air reaches the olfactory epithelium, which may disrupt the  
53 reliability of temporal coding of concentration (Shusterman et al., 2017). Despite this, previous work  
54 suggests that humans can perceive odor intensity independent of the inhalation flow rate  
55 (Teghtsoonian et al., 1978). Here, using whole cell patch recordings in awake mice, we show that faster  
56 sniffs evoke response changes identical to those caused by increasing concentration. Surprisingly  
57 however, we show that variance in sniffing has little effect on the performance of mice trained to  
58 make fine concentration discriminations. Finally, we propose that the olfactory system can make an  
59 inference about whether a response change was caused by concentration change or sniff change by  
60 encoding the parameters of sniffing on fast timescales in mitral and tufted cells, which respond to  
61 inhalation change in cell-type specific ways, allowing rapid detection of a change in sniffing.

## 62 Results

### 63 ***Changes in sniffing can mimic the effect of increased concentration on firing rate response***

64 We first wanted to determine whether the effect of sniff changes on MTC odor response could  
65 qualitatively mimic concentration changes at the level of FR change. To do this, we used whole cell  
66 recordings from identified MTCs in awake passive mice, as this allows unbiased sampling from the  
67 MTC population in terms of baseline firing rate (FR), and reliable identification of cell type based on  
68 electrophysiology (Kollo et al., 2014; Margrie et al., 2002). On each trial, mice were presented  
69 randomly with 2 s long odor stimuli calibrated to either 1% (low concentration) or 2.5% (high  
70 concentration) square pulses. On a small percentage of low concentration trials, mice also received a  
71 gentle air puff to the flank, evoking fast sniffing behavior characterised by high frequency sniffs and  
72 short inhalation duration (Fig. 1A and Supplementary Fig. 1). For all analyses in the manuscript, 'odor  
73 onset' (t=0) is defined as the first inhalation onset during the odor stimulus. Note that several  
74 parameters of sniffing co-vary with inhalation duration, including the sniff duration, the previous sniff

75 duration and the slope of the inhalation (Supplementary Fig. 2). Thus wherever we refer to ‘fast’ or  
76 ‘slow’ sniffing, this will necessarily refer to variance in these multiple parameters.

77 During recordings, it was apparent that some cells displayed overt changes in FR with the increase in  
78 concentration, and the most salient of these were increases in excitatory FR response (Fig. 1B, cell a  
79 and cell b). When comparing changes in FR evoked by concentration increase to those taking place as  
80 a result of increased sniff frequency, it was apparent that very similar changes took place (Fig. 1B).

81 Altogether we recorded from 20 MTC pairs in such a manner, with a range of FR responses to the low  
82 concentration odorant (Fig. 1C). Comparing heat maps of the changes in FR due to increased  
83 concentration and due to increased sniff frequency revealed a very similar set of changes across the  
84 dataset (Fig. 1D), which were significantly correlated compared to shuffle controls ( $R = 0.63$ ,  $p =$   
85  $5 \times 10^{-19}$ ; Fig. 1E; see methods). When taking a broad measure of the change in firing rate across the  
86 first second of the stimulus, changes in FR were significantly correlated between those resulting from  
87 concentration increase and those resulting from faster sniffing ( $R^2 = 0.62$ ,  $p = 5 \times 10^{-5}$ ,  $n = 20$ ; Fig. 1F).

88 While in the output of MTCs the effect of sniffing and concentration increase were very similar,  
89 differences were seen in the subthreshold response changes, suggesting that changes in input in the  
90 two cases were not identical: increases in inhibition were generally larger for concentration increase  
91 than for faster sniffing (Supplementary Fig. 3). We suggest this could be the result of inhibitory  
92 networks which act to normalise olfactory bulb output (within limits) in the face of increased input  
93 (Kato et al., 2013; Miyamichi et al., 2013; Roland et al., 2016).

94 Thus, while increased concentration causes greater increases in subthreshold inhibition than  
95 increased sniff frequency, the latter results in changes in the olfactory bulb output that apparently  
96 mimic those resulting from increases in concentration.

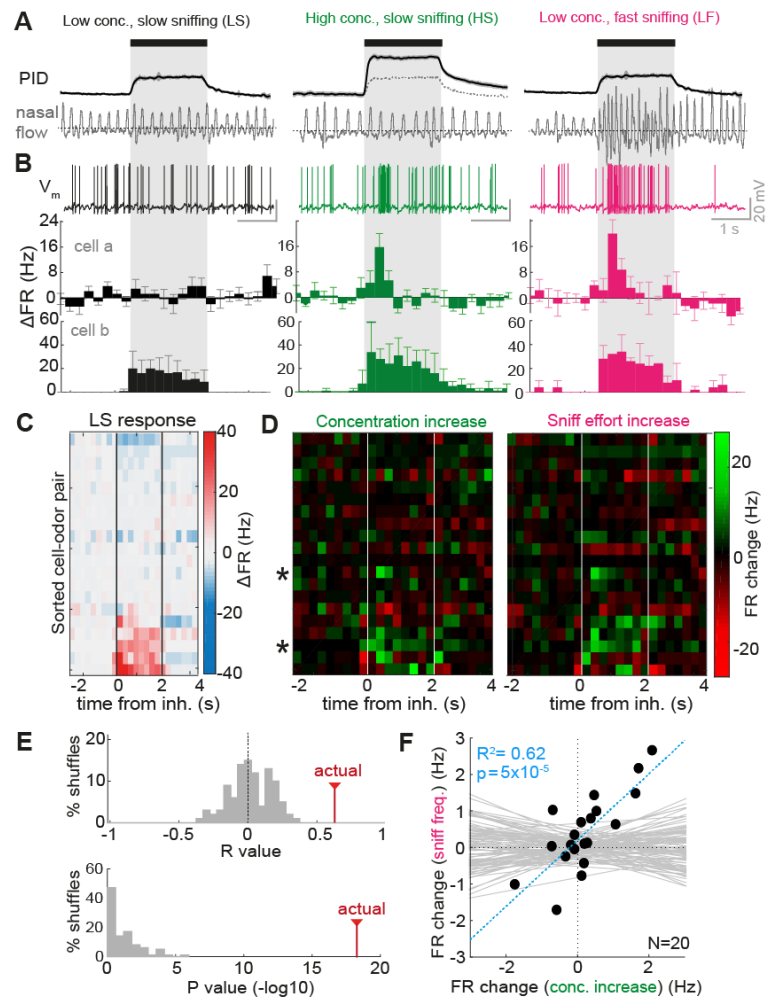

**Figure 1. Sniff change and concentration change have similar effects on FR responses of MTCs**

(A) Stimulation paradigm during whole cell recordings. PID traces show response of photoionisation detector (magnitude proportional to odor concentration), while nasal flow traces show example sniffing recorded using external flow sensor for the three types of trial. Black bar and grey box shows where odor is on, aligned to first inhalation onset. (B) Example odor responses recorded in each stimulus condition.  $V_m$  traces show example responses for cell a, while PSTHs below show averaged FR responses in 250 ms time bins for 5 trials in each case. Bottom-most PSTHs are calculated for a different example, cell b. Error bars show standard deviation. All are aligned to first inhalation onset. (C) Heatmap of average FR responses for all cell odor pairs in the low concentration slow sniff frequency condition (LS), ordered by mean FR response. (D) Heatmap of FR response differences (difference between PSTHs): Concentration increase = HS-LS, sniff frequency increase = LF-LS. Asterisks indicate cell a and cell b examples. (E) Top: R values for correlation across all odor time bins as shown in D, between FR change due to concentration change and those due to sniff frequency change. Histogram shows R values for shuffle controls, 'actual' shows R value for real data. Bottom: as for above, but histogram showing p-values for the correlations ( $-\log_{10}$ ) (F) Correlation between mean FR response change for concentration change (HS-LS) and sniff frequency change (LF-LS) across first second of odor stimulus.  $N = 20$  cell-odor pairs. Grey lines show correlations calculated for 100 shuffle controls, blue line shows real correlation.

97 ***Faster inhalation causes temporal shifts similar to those reported for concentration***

98 ***increase***

99 It has been reported that increased concentration causes changes in response on finer temporal  
100 timescales, in particular the advance of excitatory bursts (Cang and Isaacson, 2003; Fukunaga et al.,  
101 2012; Sirotin et al., 2015). Does a faster sniff similarly cause such temporal shifts on early timescales?

102 To determine this, we first analysed 13 cell-odor pairs with early excitatory responses recorded in  
103 passive mice where only a single concentration stimulus (1% saturated vapour pressure) was  
104 presented to the animal across trials. Comparing the FR response over the first 250 ms for 'fast' sniff  
105 trials (>70<sup>th</sup> percentile peak inhalation slopes), and 'slow' sniff trials (<30<sup>th</sup> percentile), it was apparent  
106 that faster inhalation could cause a latency advance of the excitatory burst (Fig. 2A-B). Across all cell-  
107 odor pairs, faster inhalation caused a significant latency reduction in mean response onset (latency  
108 change (fast-slow) =  $-16 \pm 14$  ms,  $p = 0.002$  paired t-test between onsets for slow and fast inhalations;  
109 Fig. 2C). Onset latencies displayed a significant relationship with the peak firing rate during the  
110 response ( $R^2 = 0.61$ ,  $p = 0.002$ ,  $n = 13$ ; Fig. 2E), suggesting that the most strongly activated cells respond  
111 earlier. The extent of the latency reduction for fast sniffing was significantly correlated with the onset  
112 time during slow inhalation: if the response was of longer latency during slow sniffing, the latency  
113 reduction was greater ( $R^2 = 0.46$ ,  $p = 0.01$ ,  $n = 13$ ; Fig. 2D). This indicates that those cell-odor pairs  
114 showing a stable latency are likely already responding at the earliest timescale – i.e. there is a lower  
115 limit on the latency of odor response.

116 It was previously shown in anaesthetized mice that mitral cells (MCs) undergo robust reductions in  
117 latency of excitation for concentration increase, while tufted cells (TCs) – which already respond  
118 earlier - do not (Fukunaga et al., 2012). We used sniff cycle phase preference boundaries to determine  
119 putative MC (pMC) and TC (pTC) phenotype using subthreshold activity as previously described  
120 (Fukunaga et al., 2012; Jordan et al., 2017). Examples could be found where both pMCs and pTCs  
121 underwent reductions in latency of excitation when the sniff was fast (Fig. 2A), however in general,

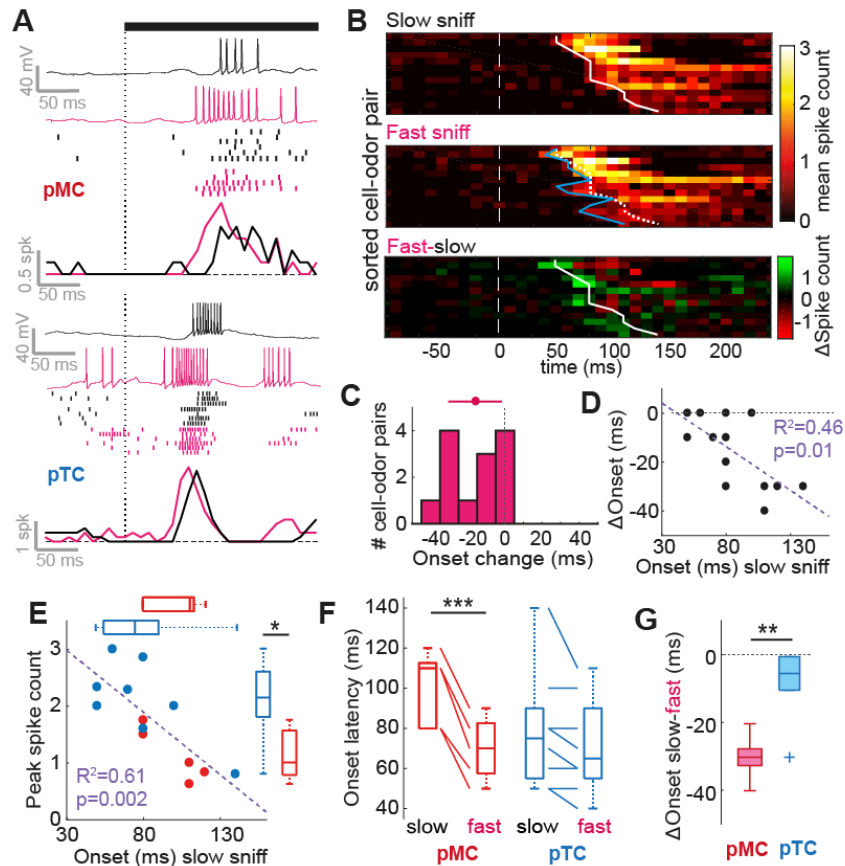

**Figure 2. Faster inhalation causes temporal shifts similar to those reported for concentration increase**

(A) Example  $V_m$  traces, spike rasters and mean spike counts for early excitatory responses for slow inhalation (black) and fast inhalation (pink), for two different cell-odor pairs. The top example is from a putative mitral cell (pMC) and bottom example is from a putative tufted cell (pTC). Rasters are ordered (top to bottom) by slowest to fastest inhalation. Black bar and dotted line indicate odor onset aligned to the first inhalation onset. (B) Heatmaps of mean spike count for 13 cell-odor pairs showing early excitation in response to slow inhalation (top) and fast inhalation (middle). White dashed line indicates odor onset aligned to the first inhalation onset. Cell odor pairs are sorted from short to long onset latency (during slow inhalation). Bottom heatmap shows the difference between the two above (fast-slow). White solid and dotted line indicates onset latency of each cell-odor pair for slow inhalation. Blue line indicates onset latency for fast inhalation. (C) Histogram of onset latency changes (fast-slow) for all 13 cell-odor pairs. (D) Scatter plot to show relationship between onset latency for slow inhalation, and the onset change between fast and slow inhalation. (E) Correlation between response onset latency and peak spike count for early excitatory odor responses evoked by a slow sniff. Blue data comes from pTCs and red data comes from pMCs. Boxplots compare the two parameters for pTCs and pMCs. (F) Comparison of response onset latencies for excitatory responses evoked by fast and slow sniffs for pMCs and pTCs. (G) Comparison of response onset latency change (fast-slow sniff) for pMCs and pTCs.

123 reductions for pMCs were greater than reductions for pTCs (pMCs: latency change =  $-30 \pm 7$  ms,  $p =$   
124  $7 \times 10^{-4}$ , paired t-test,  $n = 5$  cell-odor pairs; pTCs: latency change =  $-8 \pm 10$  ms,  $p = 0.08$ , paired t-test,  $n =$   
125  $8$  cell odor pairs; pMCs vs pTCs:  $p = 0.001$ , unpaired t-test; Fig. 2F-G), and this was largely because  
126 pTCs already tended to respond with shorter latency during slow sniffs than pMCs (pTC onset median  
127 =  $75$  ms, IQR =  $55-90$  ms; pMC onset median =  $110$  ms, IQR =  $80-113$  ms,  $p = 0.13$ , Ranksum; Fig. 2E).  
128 Thus, the temporal shifts and cell-type specificity in the effect of faster sniffing matches that previously  
129 described for concentration increases in anaesthetized mice (Fukunaga et al., 2012).

130 ***Faster inhalation mimics effect of concentration increase on latency response in the***  
131 ***timescale of a single sniff***

132 Could the effect of sniffing on latency directly mimic concentration effects at this timescale? When  
133 comparing high and low concentration stimuli over the first 250 ms in MTC recordings from passive  
134 mice (dataset as in Fig. 1), the only salient changes in response to increased concentration were  
135 latency advances of excitatory burst stimuli (Fig. 3A and B). When correlating changes in spike count  
136 as before (Fig. 1E) between those occurring for sniff change and those occurring for concentration  
137 change, there was a highly significant positive correlation between the two ( $R = 0.71$ ,  $p = 4 \times 10^{-72}$ ,  $n =$   
138  $525$  time bins; Fig. 3C). Latency reductions for concentration increase were similar in magnitude to  
139 those seen due to sniff change (Fig. 3D, mean onset advance =  $-18 \pm 10$  ms,  $p = 0.04$ ,  $n = 4$  paired t-test  
140 between onsets for low and high concentration), and similar to those previously reported (Sirotin et  
141 al., 2015). This latency change contributed to the entirety of the discriminability of the two different  
142 concentrations on this timescale, with the Euclidean distance between the two dropping to baseline  
143 if the excitatory bursts were manually shifted forward for the low concentration (Fig. 3E, 'slow sniff'  
144 vs 'slow sniff adv.', see methods). Faster inhalations during low concentration trials mimicked the  
145 latency shifts caused by concentration increase, rendering the high and low concentration stimuli  
146 indistinguishable (Fig. 3E, 'slow sniff' vs 'fast sniff'). Registering spikes to sniff cycle phase revealed



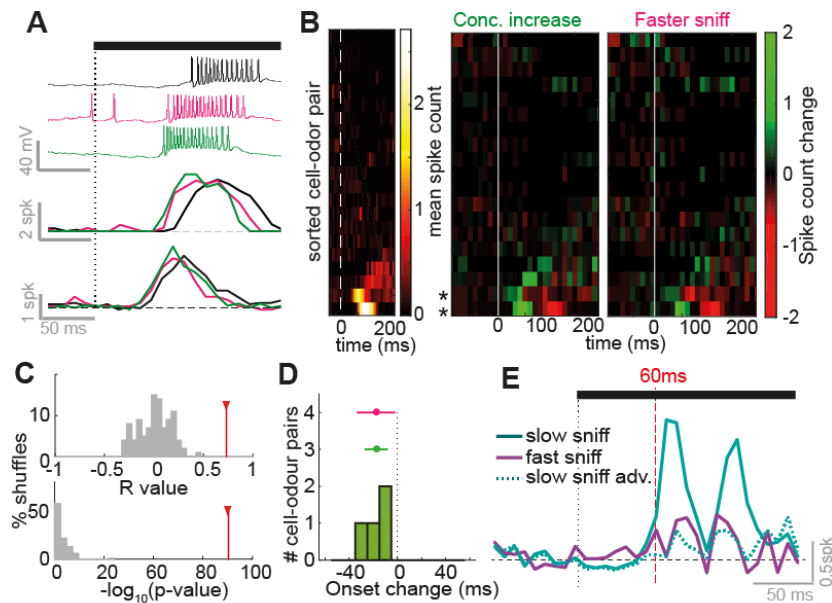

**Figure 3. Inhalation change and concentration change cause similar temporal effects on early responses.**

(A) Example traces and mean spike counts for early excitatory responses. Black shows response at low concentration evoked by slow inhalation, pink shows response at low concentration evoked by fast inhalation, and green shows response for high concentration evoked by slow inhalation. (B) Left: Heatmap to show early spike counts of all 20 cell-odor pairs recorded for low concentration and slow inhalation. Cell-odor pairs are sorted by the mean spike count during odor, from low to high. Middle: Heatmap to show difference in spike counts between high concentration and low concentration (evoked by slow inhalation). Right: heatmap to show difference in spike count between fast inhalation and slow inhalation (low concentration stimulus). (C) Top: R values for correlation across all odor time bins as shown in B, between spike count change due to concentration increase and due to faster inhalation. Histogram shows R values for shuffle controls, red bars show R value for real data. Bottom: as for above, but histogram showing p-values for the correlations ( $-\log_{10}(p\text{-value})$ ). (D) Histogram to show response onset changes due to concentration increase. Errorbar in green shows mean and SD of this data, and in pink shows the distribution of changes as in panel C for comparison. (E) Euclidean distance between population spike count response vectors for high and low concentration (where data came from slow inhalation trials; ‘slow sniff’, solid cyan), for high concentration and time-shifted low concentration (‘slow sniff adv.’; where excitatory latency changes due to concentration change were undone via time shifting of the data; dotted cyan), and for high concentration and low concentration where low concentration data came from fast inhalation trials (‘fast sniff’; solid purple).

147

148 a potential increase in the ability to detect changes in concentration despite changes in sniffing

149 (Supplementary Fig. 4; supplementary information), suggesting that the OB may require information

150 about sniff parameters in order to determine the concentration. Thus, even on short timescales, a  
151 more rapid inhalation mimics concentration increases at the level of the olfactory bulb output.

### 152 ***Mice can successfully discriminate concentrations on rapid timescales***

153 Rodents have previously demonstrated the ability to discriminate odor concentrations (Abraham et  
154 al., 2004; Parthasarathy and Bhalla, 2013; Slotnick and Ptak, 1977; Wojcik and Sirotin, 2014). Given  
155 the physiology (Fig. 1-3), and that sniff parameters are constantly varying in awake mice (Wachowiak,  
156 2011), we next sought to determine the capabilities of mice to distinguish odor concentrations in a  
157 simple head-fixed go/no-go paradigm (Fig. 4A-C), despite variance in sniffing.

158 First, mice were trained to simply distinguish high (3%) versus low (1%) concentration stimuli. 3 mice  
159 were trained with the low concentration stimulus as the CS+ ('Low go'), and 5 mice were trained with  
160 high concentration as the CS+ ('High go'). After pre-training (Supplementary Fig. 5A), all mice learned  
161 the distinction within a single training session (Fig. 4D;  $85 \pm 19$  trials to 80% correct,  $n = 8$ ). Mice also  
162 made rapid decisions based on concentration: analysis of the reaction time of mice based on lick  
163 probability showed that mice could perform the task successfully within as low as 200 ms (Fig. 4E,  
164 median = 300 ms, range = 200 to 1050 ms, see methods). Similarly, using divergence of sniffing  
165 behavior between CS+ and CS- stimuli (see methods), reaction times could be estimated at  $214 \pm 60$   
166 ms, and as low as 160 ms (Fig. 4F) - in every case the first exhalation already showing a significant  
167 difference between CS+ and CS- stimuli. Thus mice can make decisions about concentration on the  
168 timescale of a single inhalation.

169 Mice were not using flow changes from the olfactometer output to make the discrimination, as our  
170 olfactometer design keeps flow from odor outlet constant (Fig. 4G). Secondly, trigeminal stimulation  
171 was likely not being used since mice subsequently learned to discriminate the same concentrations of  
172 vanillin (an odor which is thought not to stimulate trigeminal afferents – Frasnelli et al., 2011), within  
173 a significantly shorter timeframe ( $16 \pm 14$  trials to criterion,  $p = 0.001$ , paired t-test,  $n = 6$  mice, Fig.  
174 4H), suggesting they may generalise the 'task rule' for concentrations across

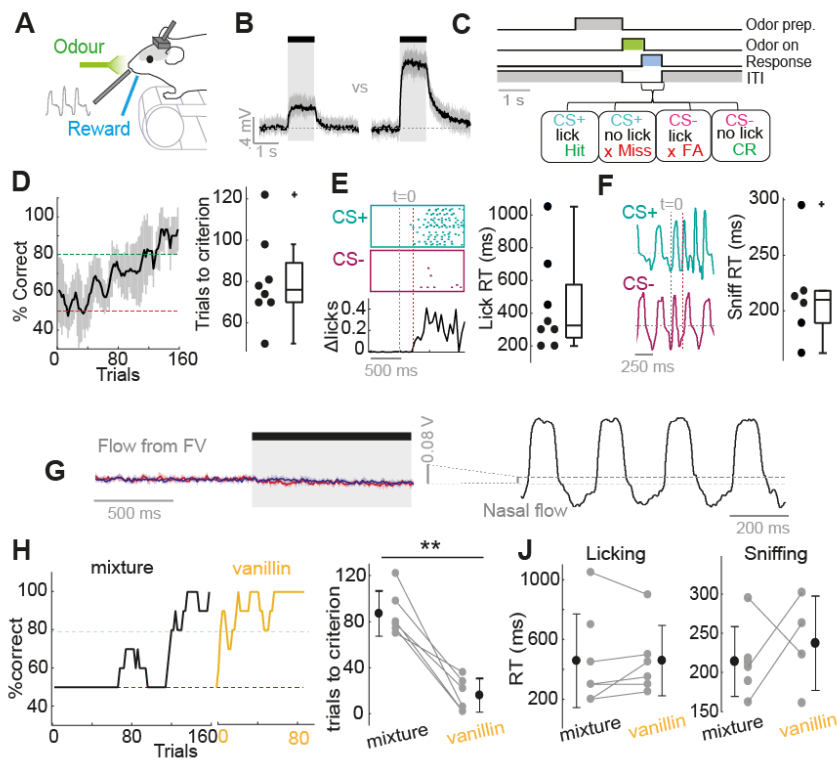

**Figure 4. Mice rapidly learn to discriminate concentrations on fast timescales.**

(A) Diagram of head-fixed behaviour (B) Average PID traces for concentration go/no-go stimuli. Shaded area shows standard deviation. (C) Concentration go/no-go task sequence. (D) Left: average learning curve for 8 mice. Percentage correct is calculated as a moving average over 5 CS+ and 5 CS- trials. Shaded area indicates SD. Right: distribution of learning times to criterion (4 successive learning curve points at or above 80% correct). (E) Left: example to show calculation of reaction time from lick behaviour. Rasters of licking during criterion performance are shown for CS+ and CS-. A difference in mean lick count over time is then calculated (bottom) and lick reaction time (RT) is determined where this difference first exceeds 2 SDs of the baseline difference. Red dotted line indicates RT calculated for this mouse. Right: distribution of lick RTs calculated in this way. (F) Left: example sniff traces for CS+ and CS- during criterion performance. Prior to licking mice show rapid sniff bouts such that RT may be determined earlier using divergence of sniff waveforms (see methods). Red dotted line indicates RT calculated for this mouse. Right: distribution of RTs calculated using sniff time divergence. (G) Mean flow change recorded 1 mm from olfactometer output for high concentration stimulus (red) and low concentration stimulus (blue). Average of 10 trials; shaded area shows standard deviation. Y scale bar is compared to that of nasal flow traces recorded in the same manner to demonstrate the negligible nature of flow change from the olfactometer. (H) Learning curves for an example mouse for 2-concentration discrimination, first for the odor mixture (in black) and subsequently for vanillin (yellow). Right hand plot compares the number of trials to criterion for the initial mixture and vanillin for each mouse. (J) Plots to compare RTs as estimated from lick behaviour (right) and sniff behaviour (left) for the mixture stimulus and vanillin for all where a reaction time was calculable.

176 different odors. Moreover, reaction times for vanillin were not significantly different than for the  
177 mixture (licking RT:  $p = 0.46$ , paired t-test,  $n = 6$ ; sniffing RT:  $237 \pm 45$  ms,  $p = 0.5$ , unpaired t-test; Fig.  
178 4J). Finally, learning in the task was likely the result of acquiring the response to the stimulus rather  
179 than learning how to perceive the difference in concentration, since on the very first presentation of  
180 the CS- concentration after pre-training on the CS+ concentration, mice typically displayed a rapid  
181 sniffing response (Supplementary Fig. 5B) classically associated with novel odor identity (Roland et al.,  
182 2016; Verhagen et al., 2007; Wesson et al., 2008b).

183 Thus, mice can very rapidly make decisions based on relatively modest concentration differences  
184 within the timescale of a single sniff, comparing very well to their abilities in odor identity tasks  
185 (Resulaj and Rinberg, 2015; Uchida and Mainen, 2003; Wesson et al., 2008b).

186 ***Variance in sniffing has no overt impact on performance in a fine concentration***  
187 ***discrimination task***

188 To determine whether sniff variation impacts the concentration decisions of mice, 7 trained mice were  
189 advanced on to a 5-concentration task. Here, three new intermediate concentrations between the  
190 two previously learned concentrations were presented (Fig. 5A). The concentration most similar to  
191 the learned CS+ was rewarded as a CS+, while the other two concentrations, including one exactly  
192 halfway between the previously learned concentrations, were treated as CS- (Fig. 5A). 2-3 sessions of  
193 200 trials were performed on this task, over which mice generally performed at a high level of accuracy  
194 (Fig. 5B-C, mean percent correct across session =  $75 \pm 6\%$ ,  $n = 7$  mice). Were mice learning a stable  
195 sniffing strategy to perform the task? This seems unlikely, as variance in inhalation duration of the first  
196 sniff for each mouse did not decrease over the session (if anything, a mild increase in sniff variance  
197 was observed:  $R = 0.72$ ,  $p = 8 \times 10^{-4}$ , regression between block number and mean variance,  $n = 18$   
198 blocks; Fig. 5C), and variance was significantly larger compared to passive control mice (behaving  
199 median first inhalation duration SD = 0.16 ms, IQR = 12 to 20 ms,  $n = 284$  mouse-block pairs ; passive  
200 median SD = 11 ms, IQR = 9 to 15 ms,  $n = 47$  mouse-block pairs;  $p = 4 \times 10^{-5}$ , Ranksum; Fig. 5C).

201 Mice displayed a graded percentage of correct versus error trials across concentrations, indicating  
202 that the discrimination task was not trivial (Fig. 5B). Thus, shifts in perceived concentration should be  
203 overtly seen in the performance curves. To test this, we first separated trials according to whether the  
204 first sniff was fast (<30th percentile inhalation duration) or slow (>70<sup>th</sup> percentile) (Fig. 5D). This  
205 resulted in a comparison of trials between which the difference in the inhalation duration matched or  
206 exceeded that used in the whole cell recordings when comparing fast and slow sniff trials (Fig. 5E).  
207 Recalculating performance curves for each subset, there were no large or significant differences in the  
208 performance curves for mice performing on either contingency (Fig. 5F;  $p > 0.01$  paired t-tests).  
209 Secondly, on a small selection of trials for 5 of the mice, the puff stimulus (as used during the  
210 physiological recordings) was used to evoke fast sniffs, including the first inhalation (Fig. 5G). The  
211 mean changes in first inhalation duration evoked by this puff were again highly comparable to that  
212 used for analysis of fast and slow sniffs in the physiological data (Fig. 5H). While this had a minor but  
213 insignificant effect on error rate likely owing to distraction (percent correct: control trials =  $83 \pm 8\%$ ,  
214 probe trials =  $77 \pm 9\%$ ,  $p = 0.16$  paired t-test,  $n = 5$  mice), there were remarkably no gross differences  
215 in the performance curves compared to control trials ( $p > 0.01$ , paired t-tests; Fig. 5J). Finally, when  
216 separating trials for each concentration according to the response of the mouse (either 'go' or 'no  
217 go'), there was no overt differences in first inhalation between go and no-go trials ( Supplementary  
218 Fig. 6).

219 Given that we have only considered the first sniff cycle, it is possible that mice take another sniff prior  
220 to making a decision if the initial sniff was fast and gave rise to ambiguity about concentration. This  
221 would be reflected in longer reaction times for fast compared to slow first sniff trials. Comparing trials

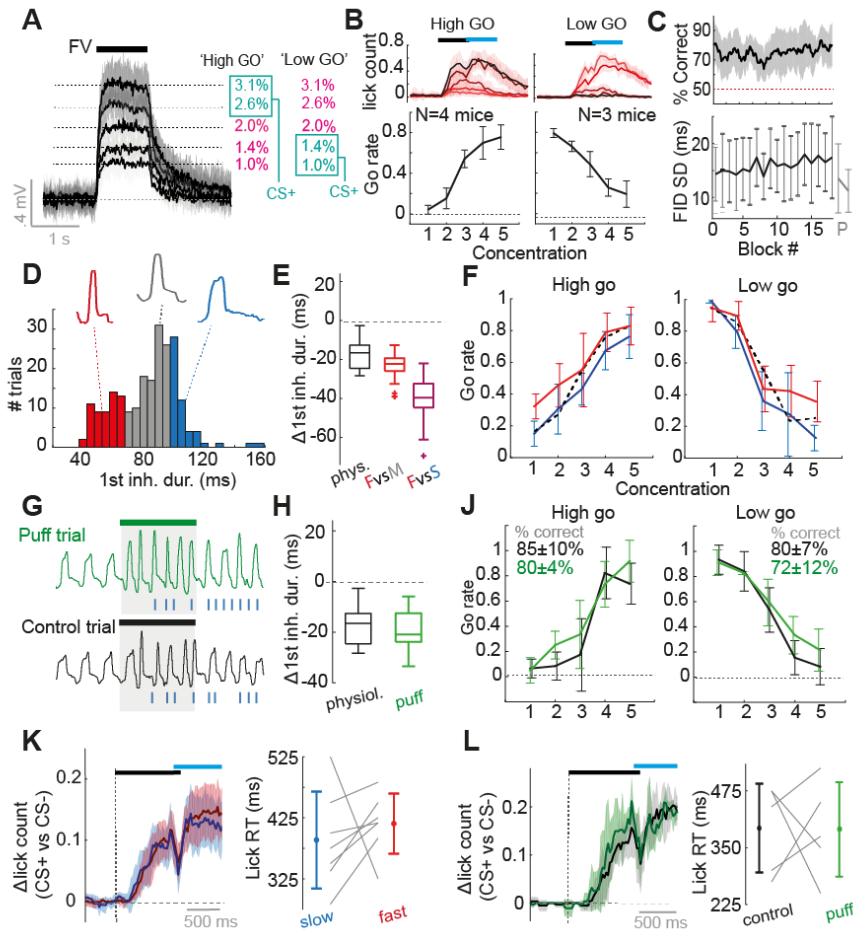

**Figure 5. Variance in inhalation has no overt impact on concentration discrimination performance.**

(A) Diagram to show average PID traces for the 5 different concentrations and contingency schemes. Shaded area shows SD. (B) Top: Mean lick counts averaged across mice for the 5 different concentrations (darkest = strongest) for both 'high go' and 'low go' contingencies. Black bar indicates odor stimulus, and blue bar indicates response period. Bottom: average go rate (percentage of trials with a go response) across mice for all 5 concentrations. (C) Top: average % correct across all sessions of the 5 concentration discrimination task ( $n = 17$  mouse-session pairs). Shaded area shows standard deviation. Bottom: mean standard deviation (SD) for first inhalation duration (ms) across 17 mouse-session pairs calculated for each 10-trial block of a session. Two grey points 'P' represent the same data but for 2 blocks in passively exposed mice ( $n = 26$  mice). Error bars = SD. (D) Example histogram of inhalation durations of the first sniff during an odor stimulus across trials for one mouse. Data for each mouse is partitioned into fast inhalations (30<sup>th</sup> percentile, red), slow inhalations (>70<sup>th</sup> percentile, blue), and other (grey). Example representative nasal flow waveforms for a single sniff of each subset are shown. (E) Comparison of changes in the first inhalation between physiology and behavioural experiment. Black ('phys.') shows distribution of mean change used for analysis of odor responses for 20 cell-odor pairs recorded in passive mice (as in Fig. 3). Red ('FvsM') shows mean difference between red and grey sections of the inhalation distribution as in panel D for all mice and concentrations ( $n = 7$  mice  $\times$  5 concentrations); Purple 'FvsS' shows the same as for 'FvsM', but shows mean difference between red and blue sections of the inhalation duration distribution as in panel D. *Continued on next page...*

(F) Go rate as a function of concentration when splitting trials according to duration of first inhalation as in D. Dotted line shows mean go rate for sniffs with inhalation between 30<sup>th</sup> and 70<sup>th</sup> percentile. (G) Example sniff traces for one animal for a puff trial (a trial in which an air puff to the flank was used to evoke fast sniffing) and an adjacent control trial of the same odor. (H) Comparison of changes in mean first inhalation duration for physiological analysis (Fig. 3, n = 20) and for puff vs control trials during behaviour (n = 7 mice x 5 concentrations). (J) Mean go rate as a function of concentration across mice for puff trials (green) vs control trials (black). (K) Average difference in lick-histograms between CS+ and CS- (highest vs lowest concentration) averaged across all 7 mice for slow sniff trials (blue data) and fast sniff trials (red data) partitioned as in panel D. Shaded area indicates SD. Black bar indicates odor stimulus, and blue bar indicates response period. Right plot shows difference in reaction times as measured by licking for fast and slow sniff trials for all 7 mice. (L) As for panel K, but now comparing lick distributions and reaction times between puff trials and control trials.

223 with fast and slow inhalations as above (Fig. 5D), reaction times (calculated between highest and  
224 lowest concentration) were not significantly different ( $\Delta$ reaction time fast-slow =  $-30 \pm 105$  ms,  $p =$   
225 0.53, paired t-test, n = 7, Fig. 5K). Similarly, reaction times were unaffected by the puff stimulus as  
226 compared to control trials ( $\Delta$ reaction time probe-control =  $30 \pm 166$  ms,  $p = 0.96$ , paired t-test, n = 5,  
227 Fig. 5L). This was also the case for finer concentration discrimination (Supplementary Fig. 6D and E).  
228 Thus, mice were not using larger amounts of information to make their decisions when sniffs were  
229 fast.

230 Reductions of inhalation duration of 10-20 ms rendered 1% and 2.5% concentrations indiscriminable  
231 within MTC responses (Fig. 3E-K). Here we are comparing similar and even larger reductions in  
232 inhalation duration, yet behaviourally the ability to discriminate concentration shows no dramatic  
233 differences, congruent with the recent findings in rats for a different task (Shusterman et al., 2017).  
234 Thus, variable sniffing appears to have no overt negative impact on concentration perception.

### 235 ***Mitral and tufted cells respond to inhalation changes in cell type specific ways***

236 We have so far shown that it is difficult to distinguish the effect of a change in inhalation or a change  
237 in concentration via their effects on MTC responses (Fig. 1-3), yet mice are perfectly capable of fine  
238 concentration discrimination in the face of fluctuating inhalations (Fig. 5). We thus conjecture that the

239 olfactory system requires information about the kind of inhalation that just occurred to infer whether  
240 concentration or sniffing evoked the response change. This could either be achieved through an  
241 efference copy of the sniffing control signal, or reafference (the sensory result of the sniff motor  
242 command). Congruent with the latter idea, OSNs have been demonstrated to respond to pressure  
243 changes (Grosmaître et al., 2007), giving rise to sniff coupling in the olfactory bulb (Adrian, 1950; Cang  
244 and Isaacson, 2003; Fukunaga et al., 2012; Macrides and Chorover, 1972; Margrie and Schaefer, 2003),  
245 which disappears with naris occlusion (Margrie and Schaefer, 2003). We thus wanted to determine  
246 whether the olfactory bulb reports changes in single sniffs on a short timescale.

247 We took baseline activity in absence of odor as a proxy for the large portion of mitral and tufted cells  
248 which will not be responsive to an odor, whose activity could instead be used to directly determine  
249 the kind of sniff that took place. To do this we analysed the cellular activity of 45 MTCs recorded in  
250 passive mice across over 1000-2000 sniffs occurring in absence of the odor. Sniffs were categorised  
251 according to inhalation duration, and peristimulus time histograms and average membrane potential  
252 waveforms were calculated over 250 ms triggered by inhalation onset for each subset (Fig. 6A-C). We  
253 found that individual mitral and tufted cells would show linear transformations in their activity  
254 according to the duration of the inhalation just occurring. For example, some cells showed increased  
255 spike count (Fig. 6A<sub>1</sub>-B<sub>1</sub>) and depolarising membrane potential (Fig. 6C<sub>1</sub>) as inhalations became faster,  
256 while others showed decreasing spike count (Fig. 6A<sub>2</sub>-B<sub>2</sub>) and more hyperpolarising membrane  
257 potential (Fig. 6C<sub>2</sub>). 24% of cells showed significant relationships between spike count and inhalation  
258 duration ( $p < 0.01$ , linear regression; Fig. 6D) compared to only 3% in shuffle controls.  $R^2$  for the actual  
259 correlations were also significantly higher than for shuffle controls (actual  $R^2$  median = 0.54, IQR=0.17-  
260 0.82; shuffled median=0.18, IQR=0.04-0.45,  $p = 1 \times 10^{-4}$ , Ranksum,  $n = 41$  vs 369; Fig. 6D). Similarly, 22%  
261 showed significant correlations with mean membrane potential compared to 2% of shuffle controls  
262 ( $p < 0.0$ , linear regression; Fig. 6D), with  $R^2$  values for the actual data being significantly higher than for  
263 shuffled data (actual  $R^2$  median = 0.56, IQR=0.20-0.73; shuffled median=0.18, IQR=0.04-0.41,  $p = 9 \times 10^{-7}$ ,  
264 Ranksum,  $n = 41$  vs 369). Timing of activity was also often linearly correlated with inhalation



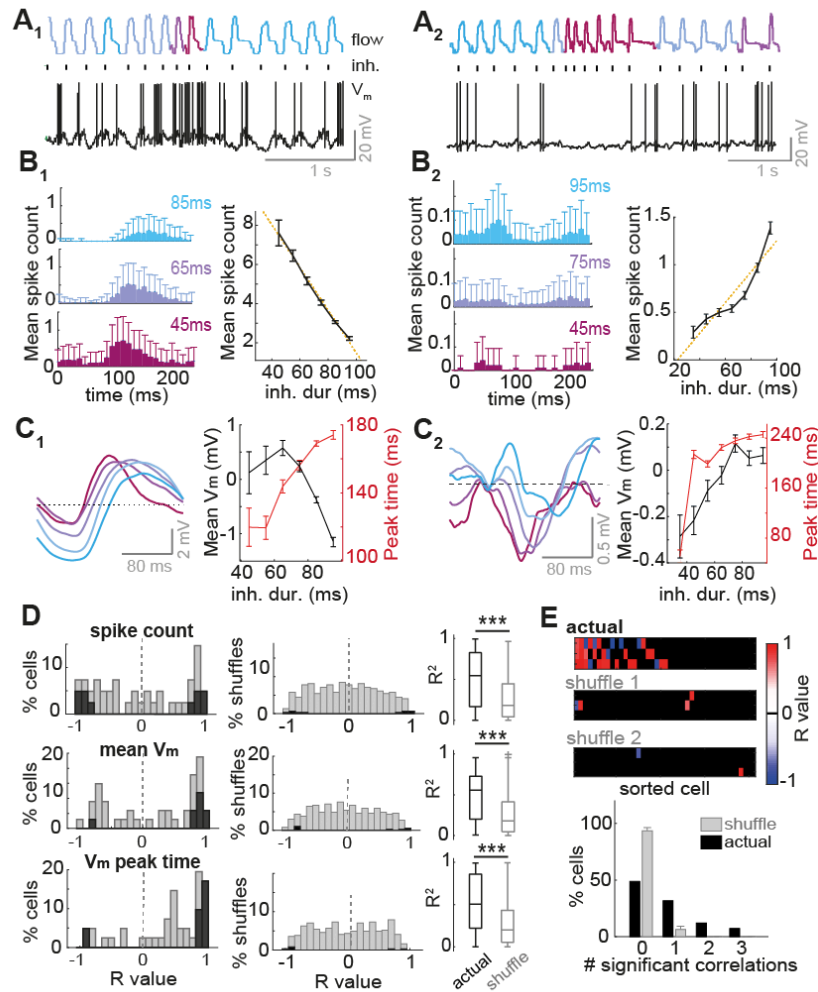

**Figure 6. Inhalation duration transforms mean baseline MTC activity in a large proportion of cells.**

A<sub>1</sub> to C<sub>1</sub> refer to one example cell, while A<sub>2</sub> to C<sub>2</sub> refer to a different example cell. **(A)** Example nasal flow traces and V<sub>m</sub> traces in absence of odor. Sniffs are colour coded according to inhalation duration (blue = slow, and red = fast). Black ticks indicate inhalation onset. **(B)** Left: Average spike count triggered by inhalations of different durations (denoted on each histogram). Right: mean spike count per sniff as a function of inhalation duration. Errorbars = standard error (SE). **(C)** Left: Inhalation-triggered mean membrane potential waveforms for sniffs of different inhalation duration. Right: mean V<sub>m</sub> and timing of V<sub>m</sub> peak for membrane potential waveforms across all sniffs as a function of inhalation duration. Errorbars = SE. **(D)** Left: Histograms of R values for correlations between inhalation duration and different activity variables: (from top to bottom) spike count, mean membrane potential, and the timing of peak membrane potential. Middle: histograms of R values between the different activity parameters and inhalation duration for shuffle controls (n = 10 shuffles x 45 cells). Dark bars show significant correlations. Right: Boxplots show comparison of actual R<sup>2</sup> values for the correlations as compared to shuffle controls.

*Continued on next page...*

(E) Top: Heatmap of R values for correlations between inhalation duration and 3 different activity parameters (spike count, mean membrane potential and timing of peak membrane potential, rows 1-3 respectively), for 45 mitral and tufted cells. Cells are sorted left-right by largest number of significant correlations to lowest number. Black squares show where the correlation was insignificant ( $p > 0.01$ , regression analysis). Two lowest heatmaps show the same data but for 2 example shuffle controls, where inhalation durations were shuffled with respect to the physiology, and the data re-analysed. This gives an indication of false positive rates in this analysis. Bottom: histogram to show proportion of cells with 0 to 3 significant correlations between the different activity parameters and inhalation duration. Grey shows proportion for shuffle controls.

266 duration, generally with the peak of the membrane potential shifting to earlier times as inhalation  
267 duration reduced (significant R values in 32% of cells vs 2% in shuffle controls (Fig. 6D); actual  $R^2$   
268 median=0.50, IQR=0.22-0.86; shuffled median=0.20, IQR=0.05-0.43,  $p=2 \times 10^{-6}$ ). Altogether 51% of cells  
269 showed a significant relationship ( $p < 0.01$ ) between inhalation duration and at least one or more of  
270 these activity parameters (Fig. 6E).

271 It has previously been suggested in anaesthetized animals that MCs and TCs are coupled to different  
272 phases of the sniff cycle, with MCs coupled to inhalation and TCs to exhalation, allowing designation  
273 of putative MC and TC phenotypes based on phase preference (Fukunaga et al., 2012) - something  
274 which is supported by recent data from the awake mouse (Jordan et al., 2017). This divergent coupling  
275 is thought to be the result of divergent sniff-driven circuit architecture, with TCs largely driven by  
276 direct excitation and MC activity heavily modulated in parallel via feed-forward inhibition (Fukunaga  
277 et al. 2012). Since reduced inhalation duration caused cells to either depolarise (negative R values  
278 between inhalation duration and mean activity – e.g. Fig. 6A<sub>1</sub>-C<sub>1</sub>) or hyperpolarise (positive R values,  
279 e.g. Fig. 6A<sub>2</sub>-C<sub>2</sub>), we wanted to test whether this could be explained by cell type. Indeed we found  
280 cases where morphologically reconstructed cells showed correlations between certain activity  
281 parameters and inhalation duration, with polarity corresponding to cell type as predicted. For  
282 example, the tufted cell in Fig. 7A<sub>1</sub>-C<sub>1</sub> showed significant depolarisation as inhalation duration gets  
283 shorter (increased spike count and more depolarised  $V_m$  waveform), while the mitral cell in Fig. 7A<sub>2</sub>-

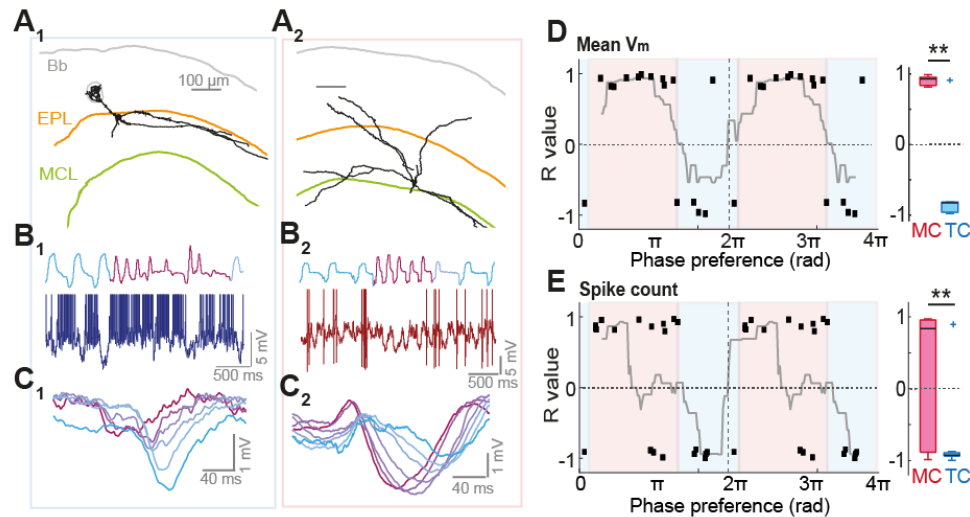

**Figure 7. Cell type specificity of effect of inhalation.**

(A<sub>1</sub>) Reconstructed morphology of a tufted cell recorded in awake mouse. ‘Bb’ refers to brain border, ‘EPL’ refers to external plexiform layer and ‘MCL’ refers to mitral cell layer (these morphologies have been previously published in Jordan et al. 2017 for different purposes). (B<sub>1</sub>) Example nasal flow and V<sub>m</sub> trace during a rapid sniff bout (blue to purple represents slow to fast inhalation on flow trace). Spikes have been cropped. (C<sub>1</sub>) Mean membrane potential waveform for different bands of inhalation duration: blue = long inhalation duration, purple = short. (A<sub>2</sub>)-(C<sub>2</sub>) as for A<sub>1</sub>-C<sub>1</sub>, but for a filled mitral cell recorded in an awake mouse. (D) R values for correlations between inhalation duration and mean V<sub>m</sub> as a function of phase preference. Only strong correlations have been included ( $p < 0.05$  and  $R^2 > 0.6$ ). Grey line shows mean R value for all cells within a 2 radian moving window (centred), to give an idea of the phase modulation strength of the data. Boxplots to the right compare all values within the putative MC (red) and putative TC (blue) phase boundaries. (E) As for panel D, but for mean spike count per sniff.

284

285 D<sub>2</sub> showed the opposite correlation, showing increasing inhibition as inhalation duration reduced. We  
 286 plotted R values for these correlations as a function of sniff cycle phase preference (calculated from  
 287 subthreshold activity) for all cells showing strong correlations ( $p < 0.05$ ,  $R^2 > 0.6$ ). Indeed, for both  
 288 parameters (mean V<sub>m</sub> and spike count), there was a significant organisation according to phase for  
 289 both mean V<sub>m</sub> ( $p < 0.01$ , bootstrapping, see methods; Fig. 7D) and spike count ( $p < 0.001$ ; bootstrapping,  
 290 see methods; Fig. 7E). Moreover, comparing R values between the phase boundaries assigned for  
 291 putative MCs and TCs resulted in significant differences between the two groups in each case (mean

292  $V_m$ : pMC: median = 0.93, IQR = 0.84 to 0.95, n = 6; pTC: median = -0.83, IQR = -0.96 to -0.82, n = 10; p  
293 = 0.002, Ranksum; spike count: pMC: median = 0.84, IQR = -0.88 to 0.96, n = 22; pTC: median = -0.92,  
294 IQR = -0.94 to -0.89, n = 12; p = 0.008, Ranksum).

295 Thus, phase locking, which likely relates to MC and TC phenotype, determines how a cell will respond  
296 to changing sniff parameters in absence of odor. Thus the large population of cells that are not directly  
297 involved with the encoding of odor information could instead be utilised to encode the parameters of  
298 each inhalation.

### 299 ***Inhalation change can be detected and decoded from MTC spiking on rapid timescales***

300 We next sought to determine whether we could read out changes in inhalation from the spiking  
301 activity of cells in absence of odor, as a proxy for cells that are not responding directly to the odor.

302 We first wanted to determine how rapidly a change in inhalation could be detected. For all cells with  
303 enough sniff variation (>50 sniffs in each inhalation duration category), we calculated sequences of  
304 spike histograms for different inhalation durations using random subsets of sniffs within each group  
305 (Fig. 8A; see methods). We constructed either a sequence with PSTHs calculated from three  
306 consecutive sniffs of 95 ms inhalation duration, or a sequence with PSTHs calculated from 2  
307 consecutive sniffs of 95 ms, with the last PSTH instead constructed from 55 ms inhalation duration  
308 sniffs (Fig. 8A). Using these, it was possible to determine a change in inhalation duration (95 to 55 ms  
309 inhalation duration) within only  $70 \pm 12$ ms by calculating Euclidean distances between constructed  
310 population vectors of the two different sequences (Fig. 8B see methods). Smaller changes in inhalation  
311 duration (95 to 75 ms) could also be detected on similarly rapid timescales (Supplementary Fig. 7).

312 We next investigated whether the population activity of multiple mitral and tufted cells provides  
313 sufficient information for reliable detection of individual sniff cycles with fast and slow inhalation  
314 speeds. From 42 single-cell recordings of mitral and tufted cell activity, we constructed an emulated  
315 population spiking matrix for respiration cycles for fast (37-80 ms) and slow (96-183 ms) inhalations.  
316 After training synaptic weights from all the 42 neurons and an activation threshold, a single output

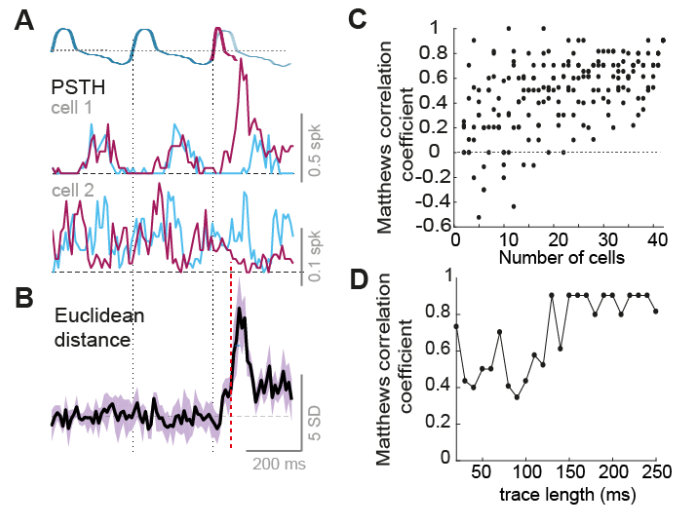

**Figure 8. MTC spiking activity is informative of the type of inhalation occurring**

(A) Top: diagram to show construction of sniff sequences of different inhalation duration: either three of 95 ms inhalation duration, or two of 95 ms with the final sniff of 55 ms duration. Below: two example PSTH sequences averages from random subsets of sniffs that show the particular inhalation duration. Blue line shows the PSTH sequence for 4 sniffs of 95 ms, and purple show sequence in which the last inhalation is of 55ms. (B) Mean Euclidean distance calculated between population vectors constructed from the two sniff sequences as in panel A. Plot shows the average of 5 different subsets of data, and shaded area shows standard deviation. Dashed red line indicates time of significant detection of change. (C) Classification performance of a trained neural network for distinction of fast and slow inhalations from the emulated population spiking activity constructed from different numbers of MTCs (see methods for details). (D) Classification performance for distinction of fast and slow inhalations for the full 42 MTC spiking dataset as a function of the time since inhalation onset.

317

318 neuron could achieve perfect detection performance of cycles with fast and slow inhalations (Fig. 8C  
319 see methods). Reliable discrimination (Matthews correlation coefficient of 0.90) of individual fast and  
320 slow inhalation cycles could be achieved within 130 ms after inhalation onset (Fig. 8D).

321 Thus, even for relatively low numbers of neurons, mitral and tufted cell activity - in absence of odor  
322 input - is informative of the inhalation that just occurred, such that non-odor responsive cells could  
323 be utilised by the olfactory system to distinguish sniff changes versus concentration changes.

## 324 **Discussion**

325 For stable perception, sensory systems must find ways of encoding of stimulus features independent  
326 of fluctuating sampling behavior. Here we show that faster sniffs can evoke response changes in the  
327 olfactory bulb that appear indistinguishable from those caused by increasing concentration (Fig. 1-3),  
328 yet mice are highly capable of perceiving concentration on fast timescales, regardless of sniffing  
329 parameters (Fig. 4-5). We reason that the only way the olfactory system can distinguish these two  
330 occurrences is via information about the kind of sniff that just occurred. This could potentially be  
331 achieved through corollary discharge from a motor circuit involved with breathing rhythms (such as  
332 the pre-bötzing complex). However we find that single MTC activity already correlates with  
333 inhalation duration (Fig. 6), and that this is likely generated from feed-forward input in a cell type  
334 specific way (Fig. 7), allowing inference about the kind of sniff that just occurred on a rapid timescale  
335 (Fig. 8). Thus, the olfactory bulb itself does not appear to be the site where the sniff-invariant percept  
336 of intensity is generated, but does appear to already contain the information needed to generate the  
337 percept elsewhere.

338 Given the timescale of decision making for concentration (Fig. 4), it seems likely that the information  
339 used by the mouse is the fast timescale temporal shifts in excitation that have been previously  
340 described (Cang and Isaacson, 2003; Fukunaga et al., 2012; Sirotin et al., 2015). Congruently, this  
341 temporal information contributes to the entirety of concentration discriminability on such a timescale  
342 in our dataset (Fig. 3E). It has been suggested that high baseline firing rates of MTCs could obscure  
343 such a latency code for concentration being used (Mainland et al., 2014), however this was based on  
344 a high estimation of baseline FRs from unit recordings. The whole cell recordings we employ here are  
345 thought to be unbiased in terms of baseline FRs (Kollo et al., 2014; Margrie et al., 2002; Shoham et al.,  
346 2006), and discriminability of MTC responses based on latency shifts is overt (Fig. 3E). Congruently it  
347 is known that mice can perceive the latency difference in optogenetic glomerular activation on the  
348 order of tens of milliseconds (Rebello et al., 2014; Smear et al., 2013).

349 Sniff changes have been hypothesized to alter odor concentration profiles within the nasal cavity  
350 (Shusterman et al., 2017; Teghtsoonian et al., 1978). Here we show for the first time directly that sniff  
351 changes can indeed mimic the effect of concentration change at the level of both firing rates (Fig. 1),  
352 and temporal shifts in spike activity (Fig. 2-3). This is not to say that OSN input is perfectly matched  
353 when we compare faster sniff rates and higher concentration. In fact, since subthreshold inhibition is  
354 greater for the higher concentration (Supplementary Fig. 3), it would appear that the input strength  
355 is higher for the case of increased concentration as compared to faster sniffing. Despite this, overt  
356 changes in the spiking output are very similar for increased sniff frequency as compared to increased  
357 concentration. Potentially, inhibitory circuits are normalising the spiking output across large changes  
358 in input (within a dynamic range), such that while we see differences in subthreshold inhibition, the  
359 excitatory spike outputs look very similar. Such a role has been suggested for periglomerular neurons  
360 (Roland et al., 2016) and parvalbumin positive interneurons in the external plexiform layer (Kato et  
361 al., 2013; Miyamichi et al., 2013).

362 It has been known for some time that the olfactory bulb is highly modulated by the sniff cycle (Adrian,  
363 1950; Cang and Isaacson, 2003; Fukunaga et al., 2012; Macrides and Chorover, 1972; Margrie and  
364 Schaefer, 2003). Since sniff modulation is more overt in anaesthetized mice and is reduced at higher  
365 sniff frequencies (Bathellier et al., 2008; Carey and Wachowiak, 2011; Kay and Laurent, 1999), the  
366 importance of sniff modulation in the awake animal may come into question. Here we find that sniff  
367 patterning of activity gives rise to linear transformations of baseline activity as inhalation parameters  
368 are changed, a feature which is widespread throughout MTCs (Fig. 6). We thus reason that a primary  
369 function of sniff modulation is to inform the olfactory system of what kind of inhalation took place,  
370 such that a change in concentration and a change in sniffing are distinguishable. Congruently we find  
371 that inhalation parameters can indeed be readily and rapidly inferred from the spiking activity of MTCs  
372 (Fig. 8).

373 Encoding of 'sniff effort' has been hypothesized previously when psychophysics showed that humans  
374 could categorise concentrations well despite large changes in inhalation flow rate (Teghtsoonian et  
375 al., 1978). Airway resistance is subject to continual changes, and even differs between the two nostrils  
376 (Principato and Ozenberger, 1970; Sobel et al., 1999), which will naturally result in varying nasal flow  
377 rates for identical respiratory motor commands. Previous work has shown that sniff modulation of the  
378 olfactory bulb is generated peripherally rather than centrally, since blocking the naris abolishes sniff  
379 modulation in the olfactory bulb (Margrie and Schaefer 2003). Thus reafference using mechanoreceptive  
380 encoding of sniff pressure, rather than efference copy of the motor commands (which would require  
381 constantly updated internal models to calculate the effect on airway flow for each nostril) may be the  
382 optimal strategy for encoding inhalation parameters. This could be the reason that olfactory receptors  
383 evolved to respond to pressure changes as well as olfactory stimuli (Connelly et al., 2015; Grosmaître  
384 et al., 2007), and indeed may comprise a feature rather than a bug in the olfactory system.  
385 Consistently, concentration perception in humans can be affected when the nostril flow rate was  
386 changed via experimenter-induced changes in airway resistance instead of volitional changes in sniff  
387 pressure (Teghtsoonian and Teghtsoonian, 1984) – i.e. only when flow rate is altered but pressure  
388 stays constant. Moreover, imaging of the olfactory cortex in humans identified a region which  
389 primarily responds to the sensory effect of sniffing in absence of odor (Sobel et al., 1998).

390 An accompanying study intuitively suggests that the advance of odor-driven excitation as sniff  
391 frequency increases is the result of fluid dynamics in the nasal cavity (Shusterman et al., 2017). A large  
392 fraction of our cells show an advance of their baseline activity peak as the inhalation becomes faster  
393 (Fig. 6D). We could thus hypothesise that non-odor responsive MTCs within a region of the bulb can  
394 provide information about the timing of inspired air reaching the epithelium. If the inhalation becomes  
395 faster, both responsive and the much larger population of unresponsive cells show a latency reduction  
396 in their peak activity, while if concentration has increased, only the sparse odor responsive population  
397 will show this latency shift. Thus, a relative timing code could be used as a sniff-invariant  
398 representation of concentration (Supplementary Fig. 9). Exactly where and how the two kinds of



399 information could be integrated to form a sniff invariant representation of concentration should be  
400 the objective of future investigations, though recent evidence from the piriform cortex of awake mice  
401 already suggests that cortical interneurons sharpen the latency shifts evoked by concentration change  
402 and encode concentration via the synchronicity of ensemble firing (Bolding and Franks, 2017). It is also  
403 possible that in a mouse performing a concentration guided task, olfactory bulb physiology could be  
404 altered by top-down circuits in such a way as to generate a sniff invariant representation of  
405 concentration using information about the sniff dynamics.

406 It is possible that at much larger sample sizes of cells than reported here, a small subpopulation of  
407 neurons capable of reporting concentration invariant across sniffs become detectable. It is also  
408 possible that we have missed activity parameters at the population level, such as spike synchrony,  
409 which could conceivably be more stable reporters of concentration in the face of fluctuating sniffs.  
410 We deem these confounds less likely since a complimentary unit recording study finds that the latency  
411 shift of excitatory response due to sniff change is widespread throughout a larger sample of MTCs  
412 (Shusterman et al., 2017).

413 In conclusion, concentration changes in the naris can either be self-generated through changes in  
414 sniffing, or the consequence of a true change in environmental concentration, yet mice can perform  
415 sniff-invariant concentration discrimination. The olfactory bulb contains information about both the  
416 odor concentration alongside the inhalation dynamics, which together may allow inference about  
417 whether a sniff change or a concentration change occurred, overall enabling sniff-invariant  
418 concentration perception.

## 419 **Author Contributions**

420 A.T.S., and R.J., designed all experiments, R.J. performed all experiments, and analysed all data apart  
421 from the discriminability of fast and slow sniffs (Fig. 8C-D), which was performed by M.K. The article  
422 was written by R.J. and M.K. with contributions from A.T.S. The authors declare no competing financial  
423 interests.

## 424 Acknowledgments

425 We thank Martyn Stopps and Nicholas Burczyk for assistance with custom made equipment, Mostafa  
426 Nashaat and Edward Bracey for initial support with behavioral training, Christoph Schmidt-Hieber for  
427 advice on whole-cell recording *in vivo*, and Roma Shusterman, Andrew Erskine, Christina Marin, Izumi  
428 Fukunaga and Kevin Bolding for helpful comments on the manuscript. This work was supported by the  
429 Francis Crick Institute which receives its core funding from Cancer Research UK (FC001153), the UK  
430 Medical Research Council (FC001153), and the Wellcome Trust (FC001153); by the UK Medical  
431 Research Council (grant reference MC\_UP\_1202/5); by the DFG (SPP 1392); and a Boehringer  
432 Ingelheim Fonds PhD fellowship to RJ. AS is a Wellcome Trust Investigator (110174/Z/15/Z).

## 433 References

- 434 Abraham, N.M., Spors, H., Carleton, A., Margrie, T.W., Kuner, T., and Schaefer, A.T. (2004).  
435 Maintaining accuracy at the expense of speed: stimulus similarity defines odor discrimination time in  
436 mice. *Neuron* 44, 865–876.
- 437 Adrian, E.D. (1950). The electrical activity of the mammalian olfactory bulb. *Electroencephalogr. Clin.*  
438 *Neurophysiol.* 2, 377–388.
- 439 Bathellier, B., Buhl, D.L., Accolla, R., and Carleton, A. (2008). Dynamic ensemble odor coding in the  
440 mammalian olfactory bulb: sensory information at different timescales. *Neuron* 57, 586–598.
- 441 Bolding, K.A., and Franks, K.M. (2017). Complementary codes for odor identity and intensity in  
442 olfactory cortex. *eLife* 6, e22630.
- 443 Cang, J., and Isaacson, J.S. (2003). *In vivo* whole-cell recording of odor-evoked synaptic transmission  
444 in the rat olfactory bulb. *J. Neurosci.* 23, 4108–4116.
- 445 Carey, R.M., and Wachowiak, M. (2011). Effect of sniffing on the temporal structure of mitral/tufted  
446 cell output from the olfactory bulb. *J. Neurosci.* 31, 10615–10626.
- 447 Cleland, T.A., Chen, S.-Y.T., Hozer, K.W., Ukatu, H.N., Wong, K.J., and Zheng, F. (2012). Sequential  
448 mechanisms underlying concentration invariance in biological olfaction. *Front. Neuroengineering* 4.
- 449 Connelly, T., Yu, Y., Grosmaître, X., Wang, J., Santarelli, L.C., Savigner, A., Qiao, X., Wang, Z., Storm,  
450 D.R., and Ma, M. (2015). G protein-coupled odorant receptors underlie mechanosensitivity in  
451 mammalian olfactory sensory neurons. *Proc. Natl. Acad. Sci.* 112, 590–595.
- 452 Cury, K.M., and Uchida, N. (2010). Robust Odor Coding via Inhalation-Coupled Transient Activity in  
453 the Mammalian Olfactory Bulb. *Neuron* 68, 570–585.
- 454 Frasnelli, J., Hummel, T., Berg, J., Huang, G., and Doty, R.L. (2011). Intranasal Localizability of  
455 Odorants: Influence of Stimulus Volume. *Chem. Senses* 36, 405–410.

- 456 Fukunaga, I., Berning, M., Kollo, M., Schmaltz, A., and Schaefer, A.T. (2012). Two Distinct Channels of  
457 Olfactory Bulb Output. *Neuron* 75, 320–329.
- 458 Ghatpande, A.S., and Reisert, J. (2011). Olfactory receptor neuron responses coding for rapid odour  
459 sampling. *J. Physiol.* 589, 2261–2273.
- 460 Grosmaître, X., Santarelli, L.C., Tan, J., Luo, M., and Ma, M. (2007). Dual functions of mammalian  
461 olfactory sensory neurons as odor detectors and mechanical sensors. *Nat. Neurosci.* 10, 348–354.
- 462 Helmholtz, H. von (1867). *Handbuch der physiologischen Optik* (Leipzig : Leopold Voss).
- 463 Jordan, R., Fukunaga, I., Kollo, M., and Schaefer, A.T. (2017). Active sampling state dynamically  
464 enhances olfactory bulb odor representation. bioRxiv 222588.
- 465 Kato, H.K., Gillet, S.N., Peters, A.J., Isaacson, J.S., and Komiyama, T. (2013). Parvalbumin-expressing  
466 interneurons linearly control olfactory bulb output. *Neuron* 80, 1218–1231.
- 467 Kay, L.M., and Laurent, G. (1999). Odor- and context-dependent modulation of mitral cell activity in  
468 behaving rats. *Nat. Neurosci.* 2, 1003–1009.
- 469 Kepecs, A., Uchida, N., and Mainen, Z.F. (2007). Rapid and precise control of sniffing during olfactory  
470 discrimination in rats. *J. Neurophysiol.* 98, 205–213.
- 471 Kollo, M., Schmaltz, A., Abdelhamid, M., Fukunaga, I., and Schaefer, A.T. (2014). “Silent” mitral cells  
472 dominate odor responses in the olfactory bulb of awake mice. *Nat. Neurosci.* 17, 1313–1315.
- 473 Macrides, F., and Chorover, S.L. (1972). Olfactory bulb units: activity correlated with inhalation cycles  
474 and odor quality. *Science* 175, 84–87.
- 475 Mainland, J., and Sobel, N. (2006). The Sniff Is Part of the Olfactory Percept. *Chem. Senses* 31, 181–  
476 196.
- 477 Mainland, J.D., Lundström, J.N., Reisert, J., and Lowe, G. (2014). From Molecule to Mind: an  
478 Integrative Perspective on Odor Intensity. *Trends Neurosci.* 37, 443–454.
- 479 Margrie, T.W., and Schaefer, A.T. (2003). Theta oscillation coupled spike latencies yield  
480 computational vigour in a mammalian sensory system. *J. Physiol.* 546, 363–374.
- 481 Margrie, T.W., Brecht, M., and Sakmann, B. (2002). In vivo, low-resistance, whole-cell recordings  
482 from neurons in the anaesthetized and awake mammalian brain. *Pflugers Arch.* 444, 491–498.
- 483 Meredith, M. (1986). Patterned response to odor in mammalian olfactory bulb: the influence of  
484 intensity. *J. Neurophysiol.* 56, 572–597.
- 485 Miyamichi, K., Shlomag-Fuchs, Y., Shu, M., Weissbourd, B.C., Luo, L., and Mizrahi, A. (2013).  
486 Dissecting local circuits: parvalbumin interneurons underlie broad feedback control of olfactory bulb  
487 output. *Neuron* 80, 1232–1245.
- 488 Parthasarathy, K., and Bhalla, U.S. (2013). Laterality and symmetry in rat olfactory behavior and in  
489 physiology of olfactory input. *J. Neurosci.* 33, 5750–5760.
- 490 Principato, J.J., and Ozenberger, J.M. (1970). Cyclical changes in nasal resistance. *Arch. Otolaryngol.*  
491 *Chic. Ill* 1960 91, 71–77.
- 492 Rebello, M.R., McTavish, T.S., Willhite, D.C., Short, S.M., Shepherd, G.M., and Verhagen, J.V. (2014).  
493 Perception of Odors Linked to Precise Timing in the Olfactory System. *PLOS Biol.* 12, e1002021.

- 494 Resulaj, A., and Rinberg, D. (2015). Novel Behavioral Paradigm Reveals Lower Temporal Limits on  
495 Mouse Olfactory Decisions. *J. Neurosci.* *35*, 11667–11673.
- 496 Roland, B., Jordan, R., Sosulski, D.L., Diodato, A., Fukunaga, I., Wickersham, I., Franks, K.M., Schaefer,  
497 A.T., and Fleischmann, A. (2016). Massive normalization of olfactory bulb output in mice with a  
498 “monoclonal nose.” *eLife* *5*, e16335.
- 499 Rospars, J.P., Lánský, P., Duchamp-Viret, P., and Duchamp, A. (2000). Spiking frequency versus  
500 odorant concentration in olfactory receptor neurons. *Biosystems* *58*, 133–141.
- 501 Rubin, B.D., and Katz, L.C. (1999). Optical imaging of odorant representations in the mammalian  
502 olfactory bulb. *Neuron* *23*, 499–511.
- 503 Shoham, S., O’Connor, D.H., and Segev, R. (2006). How silent is the brain: is there a “dark matter”  
504 problem in neuroscience? *J. Comp. Physiol. A Neuroethol. Sens. Neural. Behav. Physiol.* *192*, 777–  
505 784.
- 506 Shusterman, R., Sirotin, Y.B., Smear, M.C., Ahmadian, Y., and Rinberg, D. (2017). Sniff invariant odor  
507 coding. *bioRxiv* 174417.
- 508 Sirotin, Y.B., Shusterman, R., and Rinberg, D. (2015). Neural Coding of Perceived Odor Intensity.  
509 *eNeuro* *2*.
- 510 Slotnick, B.M., and Ptak, J.E. (1977). Olfactory intensity-difference thresholds in rats and humans.  
511 *Physiol. Behav.* *19*, 795–802.
- 512 Smear, M., Resulaj, A., Zhang, J., Bozza, T., and Rinberg, D. (2013). Multiple perceptible signals from  
513 a single olfactory glomerulus. *Nat. Neurosci.* *16*, 1687–1691.
- 514 Sobel, N., Prabhakaran, V., Desmond, J.E., Glover, G.H., Goode, R.L., Sullivan, E.V., and Gabrieli, J.D.  
515 (1998). Sniffing and smelling: separate subsystems in the human olfactory cortex. *Nature* *392*, 282–  
516 286.
- 517 Sobel, N., Khan, R.M., Saltman, A., Sullivan, E.V., and Gabrieli, J.D. (1999). The world smells different  
518 to each nostril. *Nature* *402*, 35.
- 519 Spors, H., and Grinvald, A. (2002). Spatio-temporal dynamics of odor representations in the  
520 mammalian olfactory bulb. *Neuron* *34*, 301–315.
- 521 Teghtsoonian, R., and Teghtsoonian, M. (1984). Testing a perceptual constancy model for odor  
522 strength: the effects of sniff pressure and resistance to sniffing. *Perception* *13*, 743–752.
- 523 Teghtsoonian, R., Teghtsoonian, M., Berglund, B., and Berglund, U. (1978). Invariance of odor  
524 strength with sniff vigor: an olfactory analogue to size constancy. *J. Exp. Psychol. Hum. Percept.*  
525 *Perform.* *4*, 144–152.
- 526 Uchida, N., and Mainen, Z.F. (2003). Speed and accuracy of olfactory discrimination in the rat. *Nat.*  
527 *Neurosci.* *6*, 1224–1229.
- 528 Uchida, N., and Mainen, Z.F. (2008). Odor Concentration Invariance by Chemical Ratio Coding. *Front.*  
529 *Syst. Neurosci.* *1*.
- 530 Verhagen, J.V., Wesson, D.W., Netoff, T.I., White, J.A., and Wachowiak, M. (2007). Sniffing controls  
531 an adaptive filter of sensory input to the olfactory bulb. *Nat. Neurosci.* *10*, 631–639.

- 532 Wachowiak, M. (2011). All in a sniff: olfaction as a model for active sensing. *Neuron* 71, 962–973.
- 533 Wachowiak, M., Cohen, L.B., and Zochowski, M.R. (2002). Distributed and concentration-invariant  
534 spatial representations of odorants by receptor neuron input to the turtle olfactory bulb. *J.*  
535 *Neurophysiol.* 87, 1035–1045.
- 536 Welker, W.I. (1964). Analysis of Sniffing of the Albino Rat 1). *Behaviour* 22, 223–244.
- 537 Wesson, D.W., Donahou, T.N., Johnson, M.O., and Wachowiak, M. (2008a). Sniffing behavior of mice  
538 during performance in odor-guided tasks. *Chem. Senses* 33, 581–596.
- 539 Wesson, D.W., Carey, R.M., Verhagen, J.V., and Wachowiak, M. (2008b). Rapid encoding and  
540 perception of novel odors in the rat. *PLoS Biol.* 6, e82.
- 541 Wesson, D.W., Verhagen, J.V., and Wachowiak, M. (2009). Why Sniff Fast? The Relationship Between  
542 Sniff Frequency, Odor Discrimination, and Receptor Neuron Activation in the Rat. *J. Neurophysiol.*  
543 101, 1089–1102.
- 544 Wilson, C.D., Serrano, G.O., Koulakov, A.A., and Rinberg, D. (2017). Concentration invariant odor  
545 coding. *bioRxiv* 125039.
- 546 Wojcik, P.T., and Sirotin, Y.B. (2014). Single scale for odor intensity in rat olfaction. *Curr. Biol. CB* 24,  
547 568–573.
- 548 Youngentob, S.L., Mozell, M.M., Sheehe, P.R., and Hornung, D.E. (1987). A quantitative analysis of  
549 sniffing strategies in rats performing odor detection tasks. *Physiol. Behav.* 41, 59–69.

## 550 **Methods**

551 All animal experiments were approved by the local ethics panel of the Francis Crick Institute and UK  
552 Home Office under the Animals (Scientific Procedures) Act 1986. All mice used were C57BL/6 Jax males  
553 aged between 5 and 12 weeks and were obtained by in-house breeding. All chemicals were obtained  
554 from Sigma Aldrich (Missouri, USA).

### 555 *Olfactometry*

556 Odorants were delivered to the animal using a custom made olfactometer as used previously (Kollo et  
557 al., 2014; Jordan et al., 2017). This consisted of 8 different odor channels connecting two manifolds, a  
558 clean air channel, and a final dilution channel carrying clean air. Air was pressure controlled at 1 Mbar  
559 with a pressure regulator (IR 1000, SMC Pneumatics, California, USA). Flow was computer controlled  
560 to each manifold such that the channel supplying the mouse provided a constant flow of 2000 sccm/N<sub>2</sub>  
561 at all times, meaning that no change in flow accompanied odor pulses. Odor pulses were calibrated to  
562 square pulses of different concentrations using a mini photo-ionisation detector (miniPID, Aurora

563 Scientific): briefly, pure odor was presented to the PID from an open bottle, and the maximum  
564 recorded voltage ( $V_{\max}$ ) was assumed to represent 100% saturated vapor pressure. The pulse  
565 amplitudes were then calibrated according to this value, such that a given concentration  $C$  (%  
566 saturated vapor pressure) could be specified by attaining a square pulse of amplitude equal to  
567  $C \cdot V_{\max} / 100$ . Valves and flow controllers were controlled using custom-written LabView software.  
568 Odors applied to animals included 2 different odor mixtures (for recordings, either mixture A: Methyl  
569 salicylate, eugenol, cinnamaldehyde, creosol and 1-nonanol; or mixture B: guaiacol, valeric acid, (+)-  
570 carvone, 2-phenyl ethanol and 4-allylanisol). The components of each mixture were of similar vapor  
571 pressure and proportions were adjusted according to relative vapor pressure values as previously  
572 described (Jordan et al., 2017). For behavior, either mixture A or pure vanillin odor were applied at  
573 various concentrations (Fig. 4 and 5).

#### 574 *Surgery*

575 Sterile surgical technique was applied during all surgeries. For implantation of the head-plate, mice  
576 were anaesthetized with isoflurane in 95% oxygen (5% for induction, 1.5-3% for maintenance). Local  
577 (mepivacaine, 0.5% s.c.) and general analgesics (carprofen 5 mg/kg s.c.) were applied immediately at  
578 the onset of surgery. An incision was made dorsally above the cranium overlying the cortex and  
579 cerebellum, and periosteal tissue was removed. The surface of the bone was drilled away across the  
580 implantation surface using a dental drill, and cyanoacrylate was applied to the sutures between the  
581 cranial bones to reduce movement. A stainless steel custom head-plate was then glued to the bone  
582 surface with cyanoacrylate, and dental cement was used to reinforce the bond. For mice going on to  
583 whole cell recording, an additional chamber was constructed on the bone overlying the right olfactory  
584 bulb using dental cement. After surgery, the mice were allowed to recover for 48 hours with access to  
585 wet diet.

586 *Whole cell recordings*

587 On the day of recording, mice were again anaesthetized with isoflurane as above, and carprofen  
588 analgesic injected (5 mg/kg s.c.). A 1 mm craniotomy was made overlying the right olfactory bulb, and  
589 the dura removed. A layer of 4% low melting point agar was then applied to the surface of the bulb,  
590 about 0.5-1 mm deep to reduce brain movement. Cortex buffer (125 mM NaCl, 5 mM KCl, 10 mM  
591 HEPES, 2 mM MgSO<sub>4</sub>, 2 mM CaCl<sub>2</sub>, 10 mM glucose) was used to fill the recording chamber. The animal  
592 would then be transferred to the recording rig, and allowed to awake from anaesthesia for 20 minutes.  
593 Whole-cell recordings were then made blindly by descending a 5-7 MΩ borosilicate glass micropipette  
594 (Hilgenberg, Malsfeld, Germany) filled with intracellular solution (130 mM KMeSO<sub>4</sub>, 10 mM HEPES, 7  
595 mM KCl, 2 mM ATP-Na, 2 mM ATP-Mg, 0.5 mM GTP, 0.05 mM EGTA, and in some cases 10 mM  
596 biocytin; pH adjusted to 7.4 with KOH, osmolarity=280 mOsm) through the agar and 180 μm into the  
597 olfactory bulb with high pressure. Here pressure was reduced, and the micropipette advanced in steps  
598 of 2 μm until a substantial and sudden increase in resistance was observed indicating proximity to a  
599 cell. Pressure was then dropped to zero or below, and a gigaohm seal attained. Whole-cell  
600 configuration was then achieved, and the membrane voltage recording made in current clamp mode.  
601 Identification of mitral and tufted cells was made using electrophysiological parameters, such as in  
602 input resistance below 150 MΩ, a resting membrane potential between -60 and -40 mV, and an after-  
603 hyperpolarisation waveform conforming to MTC phenotype in an independent component analysis  
604 performed as previously (Kollo et al., 2014; Jordan et al., 2017).

605 Altogether 14 cells were recorded in passive mice and presented with 2 different odor concentrations,  
606 as well as puff stimuli to evoke fast sniffing (Fig. 1 and 3). Some cells were presented two different  
607 odor stimuli (two different mixtures), such that there were 20 cell-odor pairs in total. Concentrations  
608 were presented in a pseudorandom order and puff stimuli occurred on a random subset of trials only  
609 for the low concentration. Puff stimuli were applied simultaneous with the odor stimuli with a gentle  
610 clean air stream to the flank. For some analyses, e.g. Fig. 2 and for Fig. 6-8, data was supplemented

611 with previously recorded cells from the passive mouse (Jordan et al., 2017) presented the same odor  
612 mixtures at 1% vapor pressure (n = 6 and n = 38 respectively).

### 613 *Behavioral task and training*

614 On day 0 (48 hours after surgery), mice with head-plates implanted would begin water restriction. On  
615 day 1, mice were habituated to the experimenter and hand-fed 0.5 ml of highly diluted sweetened  
616 condensed milk with a Pasteur pipette. On day 2, mice were habituated to head-fixation: mice were  
617 head-fixed above a treadmill and allowed access to free reward upon licking. On day 3, successfully  
618 habituated mice underwent operant conditioning with repeated presentations of CS+ concentration  
619 of the odor mixture until the mouse learned to lick in the 1 s after odor offset to receive the reward.  
620 On day 5, the CS- concentration was also presented alongside the CS+ concentration in a  
621 pseudorandom order, until the mice learned to refrain from licking to the CS-. Licking to the CS- would  
622 evoke an addition of 6 s to the inter trial interval. 5 mice were trained with high concentration stimuli  
623 as the CS+ ('high go'), and 3 mice were trained on the reverse contingency ('low go'). On day 6-8, mice  
624 would be presented with 5 different concentrations (3 additional concentrations spanning the range  
625 between the previously two learned concentrations), and contingencies as depicted in Fig. 5A. On day  
626 9, five mice went on to a final session: after observing criterion performance on the binary odor  
627 concentration task with the mixture as learned previously, the odor would switch to vanillin with the  
628 same contingency between concentrations. Mice were carefully monitored to maintain their body-  
629 weights above 80% of their pre-restriction weight and were ensured a minimum of 1 ml water per day  
630 regardless of performance. Any mouse showing signs of distress were immediately returned to water  
631 access.

### 632 *Data analysis*

#### 633 *Statistics*

634 In all cases, 5-95% confidence intervals were used to determine significance unless otherwise stated.

635 In all figures, a single asterisk denotes  $p < 0.05$ , double asterisk denotes  $p < 0.01$  and a triple asterisk



636 denotes  $p < 0.001$ . Means and error bars showing a single standard deviation either side are used in all  
637 cases for normally distributed data of equal variance. Two-sided Student's t-tests were used for  
638 comparison of means and Bartlett tests used to compare variances, unless otherwise stated. Boxplots  
639 are used to represent any other data (data comparisons of unequal variance, or non-normally  
640 distributed data), where median is plotted as a line within a box formed from 25th (q1) and 75th (q3)  
641 percentile. Points are drawn as outliers if they are larger than  $q3 + 1.5 \times (q3 - q1)$  or smaller than  $q1 -$   
642  $1.5 \times (q3 - q1)$ . For such data, Ranksum tests were used to compare the medians, and Browne-Forsythe  
643 tests used to compare variance, unless otherwise stated.

#### 644 *Sniff parameters*

645 Using the recording of nasal flow, different sniff parameters could be extracted. First, inhalation peaks  
646 were detected using Spike2 algorithms that mark each peak above a certain threshold voltage  
647 manually defined by the user, such that all inhalations were included and no false positives were  
648 present. Inhalation onset was defined as the nearest time-point prior to inhalation peak at which the  
649 flow trace reached zero. Inhalation offset was similarly calculated as the first time point after  
650 inhalation peak where the flow trace reached zero. Inhalation duration was defined as the difference  
651 in time between inhalation onset and offset. Peak inhalation slopes were calculated by detecting the  
652 peak value of the flow waveform differential 50-0 ms prior to inhalation peak. Sniff duration was  
653 calculated as the time between subsequent inhalation onsets. Sniff frequency was calculated by taking  
654 the inverse of the mean sniff duration within the odor time period.

#### 655 *Spike rate responses and onsets*

656 Long timescale (Fig. 1): for each cell, mean spike count was calculated in 250 ms time bins for the full  
657 2 s odor stimulus. These were then averaged across trials to generate PSTHs for low concentration  
658 and fast sniffing (5 trials of lowest mean inhalation duration), low concentration and slow sniffing (5  
659 trials with highest mean inhalation duration) and high concentration and slow sniffing. Values were  
660 quadrupled to estimate FR in Hz.

661 Short timescale (Fig. 2-3): for each cell, spike counts were calculated in 10 ms time bins for only the  
662 first 250 ms from odor onset (aligned to first inhalation onset). These spike counts were then averaged  
663 across trials for low concentration and fast inhalation (>70<sup>th</sup> percentile peak inhalation slope), low  
664 concentration and slow inhalation (<30<sup>th</sup> percentile inhalation slope) and high concentration and slow  
665 inhalation (<30<sup>th</sup> percentile). Onset for excitatory responses was defined at the point the mean spike  
666 count exceeded the mean + 2 SDs of the baseline spike rate in the 250 ms prior to odor onset, and  
667 remained there for at least 2 consecutive points.

#### 668 *V<sub>m</sub> responses*

669 To analyse subthreshold responses in absence of spiking activity, spikes and their AHPs were  
670 subtracted from the trace. This was done by first using the 'wavemark' tool in Spike2 to detect spikes  
671 by thresholding and matching them to a generated spike waveform template. The length of this spike  
672 waveform template was manually adjusted for each cell according to its AHP length, but was usually  
673 around -4ms to 20-30 ms post spike peak. A trace was then generated containing all detected spike  
674 waveforms connected by zero values, and this was subtracted from the original voltage trace.

#### 675 *Correlations between response changes due to sniffing and concentration change*

676 For both long and short timescale mean FR responses, changes in FR response were calculated for  
677 sniff change (fast-slow sniffing, low concentration odor) and concentration change (high-low  
678 concentration, slow sniffing). For all cell-odor pairs across the sample, a single regression was made  
679 between FR changes for sniff change and FR changes for concentration change in the corresponding  
680 time bins, generating an actual R and p value (Fig. 1E and 3C). For shuffle controls, low concentration  
681 trials were shuffled in respect to the sniff behaviour on each trial, and the same analysis was repeated  
682 100 times.

#### 683 *Euclidean distance analysis of concentration discriminability*

684 In reference to Fig. 3E and Supplementary Fig. 5G: Euclidean distance was taken across the population  
685 between mean spike counts for high concentration and low concentration (slow inhalation). This

686 generated a measure of discriminability between concentrations when the inhalation was slow for  
687 both concentrations. To test how much of the discriminability was due to latency shift of excitation,  
688 responses which underwent a detectable latency shift between high and low concentrations had their  
689 spike count response to low concentration manually shifted forward according to the latency shift  
690 occurring between high and low concentration. Euclidean distance was then recalculated between  
691 spike counts for high concentration and the latency-shifted spike counts at low concentration. Finally,  
692 Euclidean distances were taken between spike counts for high concentration (slow inhalation) and low  
693 concentration (fast inhalation). Time for discrimination was calculated, if possible, as the point at  
694 which the Euclidean distance exceeded the mean + 2 SDs of the baseline Euclidean distance (250 ms  
695 prior to odor onset) for at least 2 consecutive 10 ms time bins.

#### 696 *Baseline activity correlations with inhalation duration*

697 For each cell (n = 48), 1000-2000 sniffs were analysed in absence of odor. Sniffs were categorised  
698 according to their inhalation duration, 35-45 ms, 45-55 ms, 55-65 ms and so forth. For each individual  
699 sniff, different parameters were calculated from the corresponding neural activity. Mean membrane  
700 potential was calculated from the subthreshold membrane potential occurring from 0 to 250 ms from  
701 inhalation onset. Peak membrane potential was designated as the maximum membrane potential  
702 within 30-250ms after inhalation onset, and time of the peak membrane potential was calculated at  
703 the time of this maximum membrane potential relative to inhalation onset. Spike counts were  
704 calculated by summing all action potentials occurring within the same timeframe. To calculate the  
705 correlations for each parameter, each was averaged across all sniffs within the category and regression  
706 analysis was used to generate an R and p value between the resulting average parameters and the  
707 corresponding inhalation duration (minimum of the category). For each cell, inhalation duration  
708 categories were excluded from the correlation if they contained less than 25 sniffs, and cells that had  
709 less than 5 valid categories were additionally excluded. For shuffle controls, inhalation duration was  
710 shuffled throughout the data and the regression analysis repeated 10 times per cell.

711 *Euclidean distance analysis of detectability of sniff change*

712 For this analysis only cells with more than 50 sniffs during baseline in each category: 55-65 ms, 75-85  
713 ms and 95-105 ms inhalation duration were included. A random subset of 25 sniffs in each group were  
714 selected and spike activity within these samples were used to construct PSTHs. PSTHs were put in  
715 sequence, either 3 consecutive 95 ms inhalation duration sniffs (control sequence), or the same  
716 sequence but with the final sniff of a different inhalation duration, either 75 ms or 55 ms. Each PSTH  
717 was normalised such that the first 30 ms started at zero Hz on average. Euclidean distance across the  
718 population of these sequences were then calculated between the control sequence and sequences  
719 ending in 55 ms or 75 ms inhalation duration sniffs. Detection time for the change in inhalation  
720 duration was calculated where the Euclidean distance in the last sniff exceeded the mean + 2 SDs of  
721 the baseline Euclidean distance from the first 2 sniffs.

722 *Discriminability of slow and fast sniffs from emulated MC/TC population activity*

723 Sniff cycles from 42 recorded neurons (25 MC, 17 TC) were divided into fast (37-80 ms), medium (80-  
724 96 ms) and slow (96-183 ms) cohorts. All cycles with sniff duration below the 0.5th percentile (108  
725 ms) and above the 99.5th percentile (597 ms) were discarded. All cycles with inhalation duration  
726 below the 0.5th percentile (37 ms) and above the 99.5th percentile (183 ms) were discarded. From  
727 each cell the spiking activity for 400 ms (except for Fig. 8D, where the length was varied) following the  
728 inhalation onset in a randomly chosen fast or slow inhalation cycle was combined to create emulated  
729 population spike trains (32 slow and 32 fast inhalation cycles). The emulated inhalation cycles split to  
730 a training set (22 slow and 22 fast inhalation cycles) and a test set (10 slow and 10 fast inhalation  
731 cycles). For each MC/TC neuron a postsynaptic EPSPs waveform (one sample per ms) was simulated  
732 by convolving the spike train with a normalised alpha function (amplitude=10, time constant: 10 ms,  
733 see Kollo et al. 2014). The compound EPSP of the read-out neuron was calculated as the weighted  
734 linear sum of the individual EPSP waveforms of each cell (Supplementary Fig. 8). The read-out neuron  
735 was activated if the maximum of the EPSP waveform crossed the threshold value. To find the optimal  
736 values of EPSP weights and threshold, the Nelder-Mead method was used with a logistic activation

737 function in the read-out neuron. Discrimination performance of fast and slow inhalation cycles was  
738 assessed on the test set with the Matthews correlation coefficient.

#### 739 *Phase preference and putative MC and TC boundaries*

740 The theta modulation properties of each cell were calculated as previously (Fukunaga et al. 2012;  
741 Jordan et al., 2017). Due to the high variability of sniff behaviour in awake mice, analysis was restricted  
742 to sniff cycles between 0.25 and 0.3 s in duration, where the preceding sniff cycle was also within this  
743 range. Mean  $V_m$  from the spike-subtracted  $V_m$  trace was taken as a function of sniff cycle phase for at  
744 least 150 sniffs, and this was plotted as Cartesian coordinates. The angle of the mean vector calculated  
745 by averaging these Cartesian coordinates was taken as the phase preference of the cell. To determine  
746 putative MC or TC type based on phase preference, we used the phase boundaries calculated as  
747 previously (Jordan et al. 2017).

#### 748 *Modulation of sniff-activity relationships across phase preference*

749 In reference to Fig. 7D and E. To determine whether the sign of relationships between inhalation  
750 duration and the various activity parameters is modulated by the sniff phase preference of the cell, R  
751 values for the various correlations were plotted as a function of phase preference. Only correlations  
752 with a significant p value ( $<0.05$ ) and with an  $R^2 > 0.6$  were included. A sliding window of 2 radians was  
753 then used to calculate the mean R value for all cells with phase preference within the window,  
754 resulting in a mean R value as a function of phase preference. The modulation strength of mean R  
755 value as a function of phase was then calculated: the plot of mean R value was normalised to the  
756 minimum value across all phases, and the result plotted as Cartesian coordinates. The length of the  
757 mean vector calculated by averaging these Cartesian coordinates was taken as the modulation  
758 strength of the R value across phase space. To determine the significance of this modulation, R values  
759 were shuffled with respect to phase preference 10000 times, and the resulting distribution of shuffled  
760 modulation strength was compared to the value for the unshuffled data.

761 *Learning time and reaction time*

762 **Learning time:** For the generation of learning curves as in Fig. 4, a moving window was used across 5  
763 consecutive CS+ and 5 consecutive CS- trials, advanced by 1 trial on each step, and a percentage  
764 correct calculated. The trial at which this reached 80% correct for 5 consecutive points was deemed  
765 the learning time.

766 Reaction time calculations were based on 10 or more trials of 80% performance. **From lick behavior:**  
767 For each CS+ and CS-, lick probability was calculated in a moving time window of 100 ms, aligned to  
768 the first inhalation after final valve opening. The difference between the probability of licking for CS+  
769 and CS- for each time window was calculated, and the leading edge of the first window at which this  
770 calculated difference significantly deviated from the values calculated from the 2 s window prior to  
771 odor onset was considered the reaction time. **From sniff behavior:** inhalation and exhalation duration  
772 values were calculated for CS+ and CS- as a function of sniff number from odor onset. These values  
773 were compared between those calculated for CS+ and CS- using a t-test, and the reaction time was  
774 calculated based on the first inhalation or exhalation within the series to show a significant difference.
